# Supplementary material for: A review of organic small-molecule fluorescent probes for the gallium(iii) ion
Source: Royal Society of Chemistry journal article supplement (doi:10.1039/d4ay01347f), 2024-01-01
Supplement: d4ay01347f1.pdf [file d4ay01347f1.pdf]

**A review on organic small-molecule fluorescent probes for  
gallium(III) ion ( $\text{Ga}^{3+}$ )**

Liqiang Yan,<sup>a\*</sup> Xianjun Xu,<sup>a</sup> Kaiyue Bao,<sup>a</sup>

<sup>a</sup> *College of Chemistry and Bioengineering, Guilin University of Technology, Guilin, Guangxi  
541006, P.R. China*

\*Corresponding author, E-mail: liqiangyan@glut.edu.cn.

Table S1. Experimental data of Ga<sup>3+</sup> fluorescent probes.

| Probe | Solvent                                    | $\lambda_{\text{ex}}$ (nm) | $\lambda_{\text{em}}$ (nm) | Mechanism                      | LOD                             | Linear range          | RSD<   | $K_a$                                | Coincidence signal | Interference                                           | Masking agent | Application sample                                           | Ref. |
|-------|--------------------------------------------|----------------------------|----------------------------|--------------------------------|---------------------------------|-----------------------|--------|--------------------------------------|--------------------|--------------------------------------------------------|---------------|--------------------------------------------------------------|------|
| 1     | DMSO/H <sub>2</sub> O (1:1, v/v)           | 350                        | 500                        | PET, ICT                       | 13.0 nM                         | 0–2 $\mu\text{M}$     | -      | $8.85 \times 10^6 \text{ M}^{-1}$    | no                 | Cu <sup>2+</sup> , Fe <sup>3+</sup>                    | EDTA          | Hela cells, A549 cells, zebrafish                            | 40   |
| 2a    | MeCN/tris buffer (9:1, v/v)                | 421                        | 510                        | PET                            | 3.90 nM                         | 0–0.1 $\mu\text{M}$   | -      | $3.89 \times 10^9 \text{ M}^2$       | -                  | Zn <sup>2+</sup> , Cu <sup>2+</sup>                    | PPi           | -                                                            | 41   |
| 2b    | MeCN/tris buffer (9:1, v/v)                | 421                        | 513                        | PET                            | 3.97 nM                         | 0–0.1 $\mu\text{M}$   | 0.46 % | $8.59 \times 10^9 \text{ M}^2$       | -                  | no                                                     | PPi           | Water                                                        |      |
| 3a    | DMSO/Tris buffer system (9:1, v/v, pH 7.4) | 397                        | 471                        | PET, CHEF                      | 62.3 nM                         | 0.1–0.9 $\mu\text{M}$ | 0.35%  | $8.54 \times 10^8 \text{ M}^2$       | no                 | no                                                     | -             | Water                                                        | 42   |
| 3b    | DMSO/Tris buffer (9:1, v/v, pH 7.4)        | 351                        | 511                        | PET, CHEF                      | 11.5 nM                         | 0.1–0.7 $\mu\text{M}$ | 0.34%  | $1.06 \times 10^8 \text{ M}$         | no                 | no                                                     | -             | Water                                                        |      |
| 4     | DMF/Tris buffer (9:1, v/v, pH 7.4)         | 383                        | 458                        | PET                            | 14 nM                           | 1–6 $\mu\text{M}$     | 1.7 %  | $1.17 \times 10^5 \text{ M}^{-2}$    | no                 | Pd <sup>2+</sup>                                       | -             | Water, test strips                                           | 43   |
| 5a    | DMSO/Tris buffer (9:1, v/v, pH 7.4)        | 409                        | 460                        | PET                            | $8.85 \times 10^{-7} \text{ M}$ | 1–10 $\mu\text{M}$    | -      | -                                    | Al <sup>3+</sup>   | Pd <sup>2+</sup>                                       | PPi           | Water                                                        | 44   |
| 5b    | DMSO/Tris buffer (9:1, v/v, pH 7.4)        | 409                        | 466                        | PET                            | $1.21 \times 10^{-8} \text{ M}$ | 1–9 $\mu\text{M}$     | 0.50 % | -                                    | no                 | no                                                     | PPi           | Water                                                        |      |
| 6     | H <sub>2</sub> O/DMSO (v/v = 3/7)          | 390                        | 447                        | C=N isomerization              | 1.18 $\mu\text{M}$              | 5–75 $\mu\text{M}$    | -      | $5.34 \times 10^3 \text{ M}^{-1}$    | no                 | no                                                     | ATP           | MCF-7 cells, zebrafish                                       | 45   |
| 7     | DMSO/EtOH/acetate buffer (pH 3.8)          | 405                        | 470                        | -                              | 50 nM                           | 0–1.1 $\mu\text{M}$   | -      | $1.21 \times 10^5 \text{ M}^{-1}$    | no                 | Co <sup>2+</sup> , Cu <sup>2+</sup> , Fe <sup>3+</sup> | EDTA          | Water                                                        | 46   |
| 8a    | Aqueous medium (0.01% DMSO)                | 380                        | 500                        | ESIP                           | 201 nM                          | 1.6–18 $\mu\text{M}$  | -      | $2.70 \times 10^{11} \text{ M}^{-1}$ | Al <sup>3+</sup> , | Cu <sup>2+</sup>                                       | PPi           | Logic gate, Test strips, Vero cells                          | 47   |
| 8b    | Aqueous medium (0.01% DMSO)                | 320                        | 473                        | ESIP                           | 852 nM                          | 6–30 $\mu\text{M}$    | -      | $3.81 \times 10^9 \text{ M}^{-1}$    | Cu <sup>2+</sup>   | no                                                     | PPi           | Logic gate, test strips, vero cells                          |      |
| 9     | DMSO/MeOH (10:3, v/v)                      | -                          | 556                        | CHEF                           | 0.39 $\mu\text{M}$              | 0–30 $\mu\text{M}$    | -      | $2.7 \times 10^4 \text{ M}^{-1}$     | no                 | Cu <sup>+</sup> , Ba <sup>2+</sup>                     | -             | Test kit                                                     | 48   |
| 10    | DMSO-acetate buffer (1:1, v/v, pH 5.2)     | 422                        | 495                        | ESIPT, C=N isomerization, CHEF | 12.89 nM                        | 5–20 $\mu\text{M}$    | 5.83%  | $1.80 \times 10^4 \text{ M}^{-1}$    | no                 | no                                                     | -             | Human serum, urine, pork, rabbit kidney, rabbit liver, water | 49   |
| 11    | DMF/H <sub>2</sub> O (2:3, v/v)            | 370                        | 482                        | PET, CHEF                      | 4.28 $\mu\text{M}$              | 14–40                 | -      | $1.09 \times$                        | Al <sup>3+</sup>   | Cu <sup>2+</sup>                                       | EDTA          | Test paper,                                                  | 50   |

|     |                                                   |     |           |                   |                    |                      |        |                                   |                                  |                                                                  |              |                                                              |    |
|-----|---------------------------------------------------|-----|-----------|-------------------|--------------------|----------------------|--------|-----------------------------------|----------------------------------|------------------------------------------------------------------|--------------|--------------------------------------------------------------|----|
|     |                                                   |     |           |                   |                    | $\mu\text{M}$        |        | $10^4 \text{ M}^{-1}$             |                                  |                                                                  |              | smartphone recognition, A549 cells                           |    |
| 12  | bis-tris buffer solution (0.3% DMSO)              | 365 | 480       | ESIPT, PET        | 58 nM              | 0–0.5 $\mu\text{M}$  | 0.41%  | $8.5 \times 10^3 \text{ M}^{-1}$  | no                               | no                                                               | -            | Test strips, water                                           | 51 |
| 13  | PBS buffer solution (containing 0.1% DMF, pH 7.4) | 425 | 602↓/531↑ | ESIPT, CHEF       | 32.1 nM            | 2–10 $\mu\text{M}$   | 0.5%   | -                                 | no                               | no                                                               | ATP          | Logic gates, HeLa cells, nude mice                           | 52 |
| 14  | MeOH                                              | 450 | 486/516   | -                 | 0.10 $\mu\text{M}$ | -                    | -      | $2.5 \times 10^6 \text{ M}^{-1}$  | $\text{Al}^{3+}$                 | -                                                                | -            | -                                                            | 53 |
| 15  | MeOH/DMSO                                         | 481 | 570       | ICT               | -                  | -                    | -      | $5.0 \times 10^7 \text{ M}^{-2}$  | $\text{Al}^{3+}, \text{In}^{3+}$ | $\text{Fe}^{2+}, \text{Cu}^{2+}, \text{Mg}^{2+}$                 | -            | -                                                            | 54 |
| 16  | DMSO/Tris buffer (9:1, v/v, pH 7.4)               | 415 | 518       | LMCT, PET         | 3.11 nM            | 1–6 $\mu\text{M}$    | 2.19 % | $4.71 \times 10^8 \text{ M}^{-2}$ | no                               | no                                                               | PPi          | Water                                                        | 55 |
| 17  | DMSO/Tris buffer (9:1, v/v, pH 7.4)               | 340 | 516       | PET               | 20 nM              | 1–6 $\mu\text{M}$    | -      | $9.78 \times 10^8 \text{ M}^{-2}$ | no                               | no                                                               | -            | Water                                                        | 56 |
| 18  | $\text{CH}_3\text{OH}$                            | 400 | 457       | ICT, CHEF         | 0.29 nM            | 0–4 $\mu\text{M}$    | -      | $1.2 \times 10^5 \text{ M}^{-1}$  | no                               | $\text{In}^{3+}, \text{Al}^{3+}, \text{Pb}^{2+}$                 | -            | -                                                            | 57 |
| 19  | DMSO/MeOH (99:1, v:v)                             | 380 | 480       | PET               | 0.26 $\mu\text{M}$ | 0–6 $\mu\text{M}$    | -      | $2.5 \times 10^4 \text{ M}^{-1}$  | no                               | $\text{Fe}^{2+}, \text{Cu}^{2+}, \text{Fe}^{3+}, \text{Mg}^{2+}$ | -            | Test strips                                                  | 58 |
| 20  | MeOH/DMSO                                         | 452 | 550       | ICT               | -                  | -                    | -      | $9.0 \times 10^7 \text{ M}^{-2}$  | $\text{Al}^{3+}, \text{Cr}^{3+}$ | $\text{Fe}^{3+}, \text{Fe}^{2+}$                                 | -            | -                                                            | 59 |
| 21  | EtOH-HEPES buffer (98:2, v/v, pH 7.0)             | 330 | 406       | ICT               | 2.37 nM            | 1–10 $\mu\text{M}$   | -      | $3.82 \times 10^4 \text{ M}^{-1}$ | no                               | no                                                               | -            | -                                                            | 60 |
| 22  | DMSO                                              | 400 | 488       | C=N isomerization | 1.89 $\mu\text{M}$ | 0–40 $\mu\text{M}$   | -      | $1.26 \times 10^4 \text{ M}^{-1}$ | no                               | $\text{Cu}^{2+}, \text{Fe}^{3+}, \text{Hg}^{2+}$                 | -            | -                                                            | 61 |
| 23  | DMSO/PBS (1: 9, v/v, pH 7.4)                      | 380 | 450       | PET, ESIPT        | 0.11 nM            | 0–50 $\mu\text{M}$   | -      | $7.63 \times 10^3 \text{ M}^{-1}$ | no                               | $\text{Cu}^{2+}$                                                 | -            | A549 cells                                                   | 62 |
| 24  | PBS/DMSO (99:1, v/v)                              | 390 | 526       | ESIPT             | -                  | 0–1.75 $\mu\text{M}$ | -      | -                                 | no                               | $\text{Mg}^{2+}, \text{Al}^{3+}, \text{Cd}^{2+}$                 | EDTA         | prokaryotic bacteria, eukaryotic cells, vertebrate zebrafish | 63 |
| 25  | $\text{H}_2\text{O}/\text{EtOH}$ (99:1, v/v)      | 450 | 640       | ESIPT             | 82 nM              | 0–2 $\mu\text{M}$    | -      | -                                 | $\text{Al}^{3+}, \text{In}^{3+}$ | no                                                               | -            | RAW264.7 cells, OMC-1 cells, zebrafish                       | 64 |
| 26a | MeOH/ $\text{H}_2\text{O}$ (1:1, v/v)             | 350 | 465       | PET, FRET, CHEF   | 0.19 $\mu\text{M}$ | 0–40 $\mu\text{M}$   | -      | $2.80 \times 10^4 \text{ M}^{-1}$ | $\text{Al}^{3+}$                 | no                                                               | $\text{F}^-$ | Test strips, polystyrene                                     | 65 |

|     |                                               |     |           |                               |         |               |        |                                        |                                                                                              |                                                        |                                               |                                   |    |
|-----|-----------------------------------------------|-----|-----------|-------------------------------|---------|---------------|--------|----------------------------------------|----------------------------------------------------------------------------------------------|--------------------------------------------------------|-----------------------------------------------|-----------------------------------|----|
| 26b | MeOH/H <sub>2</sub> O (1:1, v/v)              | 350 | 430       | PET, FRET, CHEF               | 1.31 μM | 0–150 μM      | -      | 2.24 × 10 <sup>3</sup> M <sup>-1</sup> | no                                                                                           | no                                                     | -                                             | film                              | -  |
| 27  | EtOH/HEPES buffer (1:1, v/v, pH 7.4)          | 340 | 383       | PET                           | 10 nM   | 0–20 μM       | -      | 2.99 × 10 <sup>5</sup> M <sup>-1</sup> | Al <sup>3+</sup>                                                                             | -                                                      | -                                             | Water                             | 66 |
| 28  | DMSO/H <sub>2</sub> O (2:8, v/v)              | 375 | 467       | PET, C=N isomerization        | 3.35 nM | 0–120 μM      | -      | 7.03 × 10 <sup>4</sup> M <sup>-1</sup> | no                                                                                           | no                                                     | EDTA                                          | T24 cells, molecular logic gate   | 67 |
| 29  | EtOH (containing 0.5% THF)                    | 280 | 429       | ICT                           | 1.17 μM | 0–50 μM       | -      | 1.56 × 10 <sup>2</sup> M <sup>-2</sup> | Al <sup>3+</sup>                                                                             | -                                                      | PPi                                           | Test strips, polystyrene film     | 68 |
| 30  | Tris-HCl (pH 7.0)                             | 344 | 475       | C=N isomerization             | 57.9 nM | 0–7 μM        | -      | 3.7 × 10 <sup>4</sup> M <sup>-1</sup>  | no                                                                                           | Al <sup>3+</sup> , Zn <sup>2+</sup>                    | Na <sub>4</sub> P <sub>2</sub> O <sub>7</sub> | -                                 | 69 |
| 31  | EtOH/HEPES buffer (9:1, v/v, pH 7.4)          | 495 | 530       | Spirolactam Ring Opening      | 29 nM   | 0–40 μM       | -      | -                                      | Al <sup>3+</sup> , In <sup>3+</sup> , Tl <sup>3+</sup>                                       | no                                                     | -                                             | Test paper, water                 | 70 |
| 32  | MeOH                                          | 516 | 554       | -                             | -       | 0–1.12 μM     | -      | -                                      | Fe <sup>3+</sup> , Cr <sup>3+</sup> , In <sup>3+</sup> , Al <sup>3+</sup> , Cu <sup>2+</sup> | -                                                      | -                                             | Test strips                       | 71 |
| 33  | EtOH/HEPES buffer (9:1, v/v, pH 7.4)          | 495 | 553       | Spirolactam ring-opening      | 10 nM   | 0–40 μM       | -      | 4.79 × 10 <sup>4</sup> M <sup>-1</sup> | Al <sup>3+</sup> , In <sup>3+</sup> , Tl <sup>3+</sup>                                       | no                                                     | -                                             | Water                             | 72 |
| 34  | DMSO/HEPES buffer (9:1, v/v)                  | 522 | 584       | Spirolactam ring-opening, PET | 2.03 nM | 10–70 nM      | -      | 5.6 × 10 <sup>3</sup> M <sup>-1</sup>  | no                                                                                           | no                                                     | PPi                                           | HaCaT cells                       | 73 |
| 35  | Acetic/phosphoric/boric acids solution (pH 7) | -   | 503       | -                             | 0.54 μM | 0–25 μM       | 4.4%   | -                                      | no                                                                                           | Cd <sup>2+</sup> , Ni <sup>2+</sup> , Cu <sup>2+</sup> | -                                             | Water                             | 74 |
| 36  | MeCN                                          | 365 | 534↓/414↑ | -                             | 2.59 nM | -             | -      | log K <sub>a</sub> = 10.79             | Al <sup>3+</sup> , Fe <sup>3+</sup> , Cr <sup>3+</sup> , As <sup>3+</sup> , In <sup>3+</sup> | -                                                      | -                                             | -                                 | 75 |
| 37  | CH <sub>3</sub> CN                            | 332 | 431       | ESIPT, CHEF                   | 1 μM    | 0.5–8 μM      | -      | 6.24 × 10 <sup>4</sup> M <sup>-1</sup> | Al <sup>3+</sup>                                                                             | no                                                     | -                                             | -                                 | 76 |
| 38  | DMSO                                          | -   | -         | -                             | 84 pM   | 0.1 μM–100 mM | 28.62% | -                                      | no                                                                                           | -                                                      | -                                             | Serum, water                      | 26 |
| 39  | MeOH/H <sub>2</sub> O                         | -   | -         | -                             | -       | -             | -      | -                                      | no                                                                                           | Fe <sup>3+</sup> , Cu <sup>2+</sup>                    | -                                             | -                                 | 77 |
| 40  | DMSO/H <sub>2</sub> O (5:1, v/v)              | 350 | 460↑/535↓ | LMCT, ESIPT                   | 53.5 nM | 0–1.0 μM      | -      | -                                      | Al <sup>3+</sup> , In <sup>3+</sup>                                                          | no                                                     | EDTA                                          | HeLa cells, A549 cells, zebrafish | 78 |
| 41  | DMSO/H <sub>2</sub> O (9:1, v/v)              | 450 | 545       | C=N isomerization, PET, CHEF  | 48.8 nM | 8–28 μM       | -      | 2.06 × 10 <sup>4</sup> M <sup>-1</sup> | no                                                                                           | no                                                     | PPi                                           | Onion inner epidermal cells       | 79 |

|    |                                     |     |     |           |         |           |        |                                    |                                                        |                                                        |      |                                      |    |
|----|-------------------------------------|-----|-----|-----------|---------|-----------|--------|------------------------------------|--------------------------------------------------------|--------------------------------------------------------|------|--------------------------------------|----|
| 42 | DMSO/Tris buffer (9:1, v/v, pH 7.4) | 420 | 496 | ICT, CHEF | 4.42 nM | 10–100 nM | 1.68 % | -                                  | In <sup>3+</sup> , Fe <sup>3+</sup>                    | no                                                     | -    | Water                                | 80 |
| 43 | DMSO/Tris buffer (9:1, v/v, pH 7.4) | 414 | 471 | PET       | 34 nM   | 0–30 μM   | -      | $7.1 \times 10^6$ M <sup>-1</sup>  | no                                                     | no                                                     | EDTA | Water, HCT116 cells                  | 81 |
| 44 | MeCN:H <sub>2</sub> O (9:1,v/v)     | 300 | 337 | -         | 1.60 μM | 0–32.5 μM | -      | $1.64 \times 10^4$ M <sup>-1</sup> | Al <sup>3+</sup> , In <sup>3+</sup> , Fe <sup>3+</sup> | Cu <sup>2+</sup> , Fe <sup>3+</sup> , Fe <sup>2+</sup> | EDTA | Logic gate, Test strips, MCF-7 cells | 82 |

“-” means that it was not mentioned in the literature. “no” indicates that the experiment demonstrated without obvious interference or effect.
